# Supplementary material
Source: PubMed Central journal article supplement (PMC8170544)

## Supplemental Online Content

Bernstein RA, Kamel H, Granger CB, et al; for the STROKE AF Investigators. Effect of Long-term Continuous Cardiac Monitoring vs Usual Care on Detection of Atrial Fibrillation in Patients With Stroke Attributed to Large- or Small-Vessel Disease. *JAMA*. Published online June 1, 2021. doi:10.1001/jama.2021.6470

### **Supplement 3.** eTables and eFigure

This supplemental material has been provided by the authors to give readers additional information about their work.

## Online Supplement 3

### Table of Contents

|                                                                                                                      |   |
|----------------------------------------------------------------------------------------------------------------------|---|
| <b>eTable 1. Modifications made to the Clinical Investigation Plan after study initiation</b> .....                  | 2 |
| <b>eTable 2. Required programming for the Reveal LINQ</b> .....                                                      | 3 |
| <b>eTable 3. Supporting detail collected for recurrent stroke and transient ischemic attack events</b><br>.....      | 4 |
| <b>eTable 4. Baseline characteristics according to early exit</b> .....                                              | 5 |
| <b>eTable 5. Baseline characteristics according to TOAST subtype</b> .....                                           | 6 |
| <b>eTable 6. Major baseline echocardiographic features associated with cardioembolism</b> .....                      | 7 |
| <b>eTable 7. Classification of first recurrent ischemic stroke according to TOAST subtype at 12<br/>months</b> ..... | 8 |
| <b>eFigure 1. Duration of the longest AF episode detected per patient in the ICM group</b> .....                     | 9 |

**eTable 1. Modifications made to the Clinical Investigation Plan after study initiation**

| <b>CIP Version</b> | <b>Change</b>                                                                                                                                                                                                                                 | <b>Rationale</b>                                                                                   |
|--------------------|-----------------------------------------------------------------------------------------------------------------------------------------------------------------------------------------------------------------------------------------------|----------------------------------------------------------------------------------------------------|
| 4.0                | From 200 patients with small vessel disease (lacunar stroke) to a maximum of 50%                                                                                                                                                              | Allow equal characterization of an ischemic stroke population                                      |
| 4.0                | Data Collection and Study Procedures were updated to allow either interrogation or remote CareLink transmission during follow-up (patients in ICM arm)                                                                                        | Include either mode of device data collection for patients completing visits in-clinic or remotely |
| 3.0                | Addition of AF related hospitalization to Ancillary Endpoint #7 related to describing economic burden of the disease                                                                                                                          | Business decision for additional analysis                                                          |
| 3.0                | Removed adjudication of ALL reported arrhythmias                                                                                                                                                                                              | Consistency with adjudication of time to first event                                               |
| 3.0                | Removed “in-clinic” for Follow-up Procedure. Data can be collected remotely                                                                                                                                                                   | Reduce patient burden of attending in-clinic as all data may be captured remotely                  |
| 3.0                | Enrollment timeline updated from 20 to 42 months and study from 4.5 to 6.5 years                                                                                                                                                              | Estimate updated per observed enrollment rate                                                      |
| 3.0                | Removed stopping rule for enrollment based on number of AF events (initially enrollment would be closed once the required number of AF events needed to demonstrate a statistical difference between hazard rates in the 2 arms was achieved) | Robust study with adequate data for analysis of all objectives                                     |

**eTable 2. Required programming for the Reveal LINQ**

| <b>Parameter</b>          | <b>Required Setting</b>         |
|---------------------------|---------------------------------|
| Reason for Monitoring     | Cryptogenic Stroke <sup>a</sup> |
| AF Detection Sensitivity  | Balanced Sensitivity            |
| Ectopy Rejection          | Aggressive                      |
| AT/AF Recording Threshold | All Episodes                    |
| Type of AT/AF Detection   | AF Only                         |
| Wireless Data Priority    | Tachy, Pause, Brady             |
| Tachy Detection           | ON                              |
| Brady Detection           | ON                              |
| Pause Detection           | ON                              |

<sup>a</sup>This setting defines the sensitivity and specificity of the Reveal LINQ device and reflects the most appropriate programming parameters for stroke patients.

**eTable 3. Supporting detail collected for recurrent stroke and transient ischemic attack events**

|                                                                                                                                  |
|----------------------------------------------------------------------------------------------------------------------------------|
| <ul style="list-style-type: none"><li>• Details about the stroke event, such as type, size, and location</li></ul>               |
| <ul style="list-style-type: none"><li>• TOAST stroke classification</li></ul>                                                    |
| <ul style="list-style-type: none"><li>• National Institute of Health (NIH) Stroke Scale</li></ul>                                |
| <ul style="list-style-type: none"><li>• Modified Rankin Scale</li></ul>                                                          |
| <ul style="list-style-type: none"><li>• Reveal LINQ Interrogation (if available, subjects with a Reveal LINQ ICM only)</li></ul> |
| <ul style="list-style-type: none"><li>• AF Assessment</li></ul>                                                                  |
| <ul style="list-style-type: none"><li>• Adverse Event e-CRF</li></ul>                                                            |

**eTable 4. Baseline characteristics according to early exit**

|                                                            | <b>Exited before 12 months<br/>(n = 58)</b> | <b>Remained in study<br/>(n = 434)</b> |
|------------------------------------------------------------|---------------------------------------------|----------------------------------------|
| Age, y                                                     |                                             |                                        |
| Mean (SD)                                                  | 66.8 (10.8)                                 | 67.1 (9.2)                             |
| <65                                                        | 28 (48.3%)                                  | 187 (43.1%)                            |
| 65 - 74                                                    | 14 (24.1%)                                  | 144 (33.2%)                            |
| 75+                                                        | 14 (24.1%)                                  | 103 (23.7%)                            |
| Male, n (%)                                                | 41 (70.7%)                                  | 264 (60.8%)                            |
| Female, n(%)                                               | 15 (25.9%)                                  | 170 (39.2%)                            |
| CHA <sub>2</sub> DS <sub>2</sub> -VASc Score, median (IQR) | 5.0 (3.0 - 6.0)                             | 5.0 (4.0 - 6.0)                        |
| Comorbidities/risk factors                                 |                                             |                                        |
| Congestive Heart Failure n (%)                             | 13 (17.3%)                                  | 38 (9.1%)                              |
| Hypertension n (%)                                         | 60 (80.0%)                                  | 337 (80.8%)                            |
| Diabetes, n (%)                                            | 28 (48.3%)                                  | 159 (36.6%)                            |
| Stroke, n (%)                                              | 58 (100.0%)                                 | 434 (100.0%)                           |
| Vascular Disease, n (%)                                    | 10 (17.2%)                                  | 82 (18.9%)                             |
| Smoking tobacco, n (%)                                     | 28 (48.3%)                                  | 235 (54.1%)                            |
| TOAST Classification                                       |                                             |                                        |
| Large-artery atherosclerosis                               | 28 (48.3%)                                  | 254 (58.5%)                            |
| Small-vessel occlusion (lacune)                            | 28 (48.3%)                                  | 180 (41.5%)                            |
| Score on NIH Stroke Scale, median (IQR)                    | 2.0 (1.0 – 4.0)                             | 2.0 (1.0 – 5.0)                        |

Abbreviation: TIA: Transient ischemic attack.

**eTable 5. Baseline characteristics according to TOAST subtype**

|                                                            | <b>Small vessel disease<br/>(n = 208)</b> | <b>Large vessel disease<br/>(n = 284)</b> |
|------------------------------------------------------------|-------------------------------------------|-------------------------------------------|
| Age, y                                                     |                                           |                                           |
| Mean (SD)                                                  | 67.5 (9.4)                                | 66.7 (9.5)                                |
| <65                                                        | 89 (42.8%)                                | 126 (44.4%)                               |
| 65 - 74                                                    | 69 (33.2%)                                | 89 (31.3%)                                |
| 75+                                                        | 50 (24.0%)                                | 67 (23.6%)                                |
| Male, n (%)                                                | 126 (60.6%)                               | 179 (63.0%)                               |
| Female, n (%)                                              | 82 (39.4%)                                | 103 (36.3%)                               |
| CHA <sub>2</sub> DS <sub>2</sub> -VASc Score, median (IQR) | 5.0 (4.0 - 6.0)                           | 5.0 (4.0 - 5.5)                           |
| Comorbidities/risk factors                                 |                                           |                                           |
| Congestive Heart Failure, n (%)                            | 22 (10.6%)                                | 29 (10.2%)                                |
| Hypertension, n (%)                                        | 170 (81.7%)                               | 227 (79.9%)                               |
| Diabetes, n (%)                                            | 92 (44.2%)                                | 95 (33.5%)                                |
| Stroke, n (%)                                              | 208 (100.0%)                              | 284 (100.0%)                              |
| Vascular Disease, n (%)                                    | 40 (19.2%)                                | 52 (18.3%)                                |
| Smoking tobacco, n (%)                                     | 96 (46.2%)                                | 167 (58.8%)                               |
| Score on NIH Stroke Scale, median (IQR)                    | 2.0 (1.0 – 4.0)                           | 2.0 (1.0 – 5.0)                           |

Abbreviation: TIA: Transient ischemic attack.

**eTable 6. Major baseline echocardiographic features associated with cardioembolism**

|                                                      | <b>Insertable cardiac monitor (n=242)<sup>a</sup></b> | <b>Control (n=250)<sup>a</sup></b> |
|------------------------------------------------------|-------------------------------------------------------|------------------------------------|
| LVEF (%), median (IQR) [N]                           | 62.0 (57.0-65.0)<br>[215]                             | 62.3 (57.0 - 65.0)<br>[232]        |
| Enlarged left atrial diameter (mm), median (IQR) [N] | 36.0 (32.0 – 40.0)<br>[166]                           | 36.0 (30.5 – 41.0)<br>[160]        |
| Enlarged left atrial volume (ml), median (IQR) [N]   | 40.0 (27.3-56.0)<br>[142]                             | 40.1 (29.3-54.4)<br>[144]          |
| Mitral Valvular Regurgitation, n (%)                 |                                                       |                                    |
| None                                                 | 103 (42.6%)                                           | 113 (45.2%)                        |
| Mild                                                 | 114 (47.1%)                                           | 115 (46.0%)                        |
| Moderate                                             | 2 (0.8%)                                              | 4 (1.6%)                           |
| Severe                                               | 0 (0.0%)                                              | 0 (0.0%)                           |
| Mitral Valvular Stenosis, n (%)                      |                                                       |                                    |
| None                                                 | 200 (82.6%)                                           | 203 (81.2%)                        |
| Mild                                                 | 14 (5.8%)                                             | 20 (8.0%)                          |
| Moderate                                             | 2 (0.8%)                                              | 7 (2.8%)                           |
| Severe                                               | 0 (0.0%)                                              | 0 (0.0%)                           |

<sup>a</sup> Unless otherwise noted.



**eTable 7. Classification of first recurrent ischemic stroke according to TOAST subtype at 12 months**

| <b>TOAST Classification</b>         | <b>Insertable cardiac monitor (n = 16)</b> | <b>Control (n = 23)</b> |
|-------------------------------------|--------------------------------------------|-------------------------|
| Cardioembolism                      | 1 (6.3%)                                   | 0 (0.0%)                |
| Large-artery atherosclerosis        | 6 (37.5%)                                  | 13 (56.5%)              |
| Small-vessel occlusion (lacune)     | 6 (37.5%)                                  | 4 (17.4%)               |
| Stroke of other determined etiology | 0 (0.0%)                                   | 3 (13.0%)               |
| Stroke of undetermined etiology     | 1 (6.3%)                                   | 3 (13.0%)               |

**eFigure 1. Duration of the longest AF episode detected per patient in the ICM group**

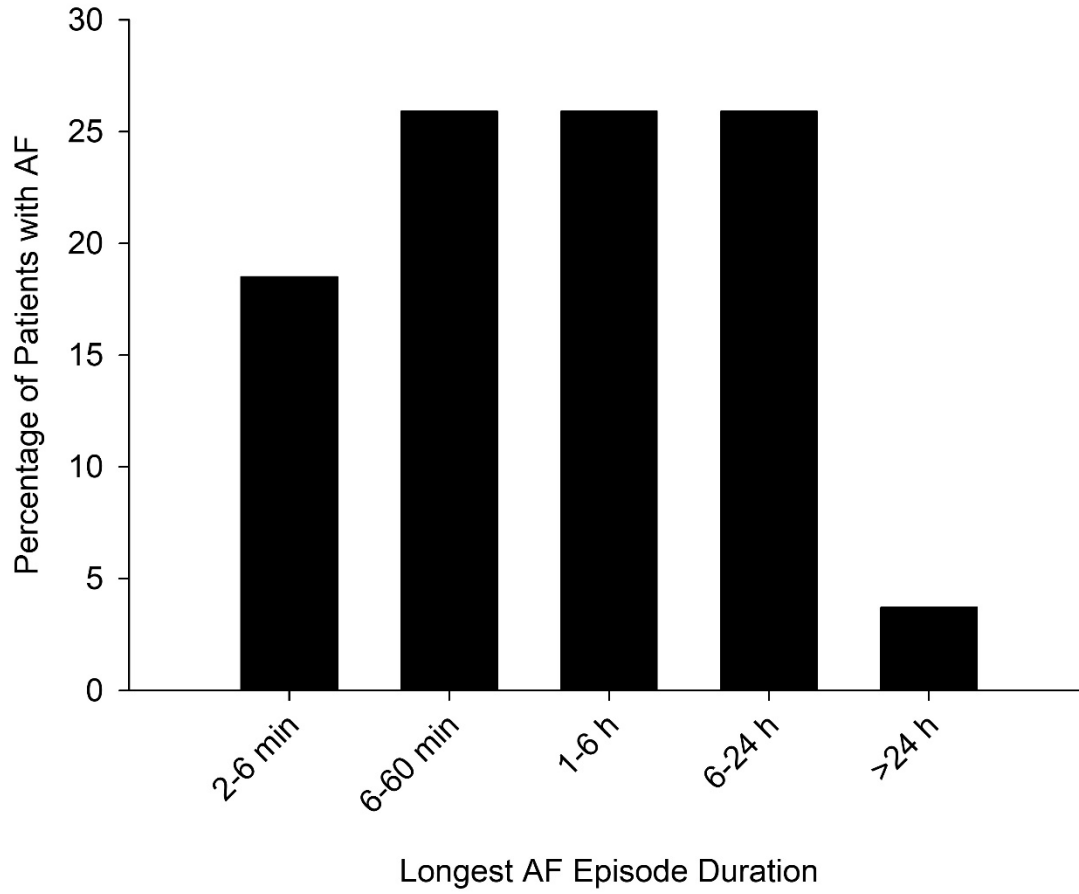

Supplement: jama-e216470-s003.pdf [file jama-e216470-s003.pdf]
