# Supplementary material
Source: PubMed Central journal article supplement (PMC8170544)
Supplement: jama-e216470-s004.pdf [file jama-e216470-s004.pdf]

\*Indicates required information. Only first name, last name, and suffix will appear in PubMed.

| <b>*Group Name(s): The STROKE AF Investigators</b> |                   |                              |                         |                                     |                                                 |                                                                |                                                                                                   |
|----------------------------------------------------|-------------------|------------------------------|-------------------------|-------------------------------------|-------------------------------------------------|----------------------------------------------------------------|---------------------------------------------------------------------------------------------------|
| <b>*First Name and Middle Initial(s)</b>           | <b>*Last Name</b> | <b>*Suffix (eg, Jr, III)</b> | <b>Academic Degrees</b> | <b>Institution</b>                  | <b>Location (city, state/province, country)</b> | <b>Role or Contribution, eg, chair, principal investigator</b> | <b>Group (if more than 1 Group listed in the byline) and/or Subgroup (eg, Steering Committee)</b> |
| Indrani                                            | Acosta            |                              |                         | AdventHealth Neuroscience Institute | Orlando, FL, United States                      | Principal Investigator                                         |                                                                                                   |
| Pradipkumar                                        | Jamnadas          |                              |                         | AdventHealth Neuroscience Institute | Orlando, FL, United States                      | Sub-Investigator                                               |                                                                                                   |
| Sushma                                             | Manda             |                              |                         | AdventHealth Neuroscience Institute | Orlando, FL, United States                      | Sub-Investigator                                               |                                                                                                   |
| Rizwan                                             | Alimohammad       |                              |                         | Albany Medical Center               | Albany, NY, United States                       | Principal Investigator                                         |                                                                                                   |
| Valerie                                            | Arias             |                              |                         | Albany Medical Center               | Albany, NY, United States                       | Sub-Investigator                                               |                                                                                                   |
| Kristi                                             | Tempro            |                              |                         | Albany Medical Center               | Albany, NY, United States                       | Sub-Investigator                                               |                                                                                                   |
| Kathleen                                           | Ward              |                              |                         | Albany Medical Center               | Albany, NY, United States                       | Sub-Investigator                                               |                                                                                                   |
| Khaled                                             | Asi               |                              |                         | Aurora Saint Luke's Medical Center  | Milwaukee, WI, United States                    | Former PI                                                      |                                                                                                   |

## Supplemental Online Content: Nonauthor Collaborators

\*Indicates required information. Only first name, last name, and suffix will appear in PubMed.

| *First Name and Middle Initial(s) | *Last Name | *Suffix (eg, Jr, III) | Academic Degrees | Institution                        | Location (city, state/province, country) | Role or Contribution, eg, chair, principal investigator | Group (if more than 1 Group listed in the byline) and/or Subgroup (eg, Steering Committee) |  |
|-----------------------------------|------------|-----------------------|------------------|------------------------------------|------------------------------------------|---------------------------------------------------------|--------------------------------------------------------------------------------------------|--|
| Indrajit                          | Choudhuri  |                       |                  | Aurora Saint Luke's Medical Center | Milwaukee, WI, United States             | Sub-Investigator                                        |                                                                                            |  |
| Waldo                             | Guerrero   |                       |                  | Aurora Saint Luke's Medical Center | Milwaukee, WI, United States             | Sub-Investigator                                        |                                                                                            |  |
| Junaid                            | Kalia      |                       |                  | Aurora Saint Luke's Medical Center | Milwaukee, WI, United States             | Sub-Investigator                                        |                                                                                            |  |
| Imran                             | Niazi      |                       |                  | Aurora Saint Luke's Medical Center | Milwaukee, WI, United States             | Sub-Investigator                                        |                                                                                            |  |
| Rehan                             | Sajjad     |                       |                  | Aurora Saint Luke's Medical Center | Milwaukee, WI, United States             | Sub-Investigator                                        |                                                                                            |  |
| Varoon                            | Thavapalan |                       |                  | Aurora Saint Luke's Medical Center | Milwaukee, WI, United States             | Principal Investigator                                  |                                                                                            |  |

Supplemental Online Content: Nonauthor Collaborators

\*Indicates required information. Only first name, last name, and suffix will appear in PubMed.

| *First Name and Middle Initial(s) | *Last Name | *Suffix (eg, Jr, III) | Academic Degrees | Institution                                                                | Location (city, state/province, country) | Role or Contribution, eg, chair, principal investigator | Group (if more than 1 Group listed in the byline) and/or Subgroup (eg, Steering Committee) |  |
|-----------------------------------|------------|-----------------------|------------------|----------------------------------------------------------------------------|------------------------------------------|---------------------------------------------------------|--------------------------------------------------------------------------------------------|--|
| Manish                            | Assar      |                       |                  | Baylor Research Institute Dallas - Baylor University Medical Center (BUMC) | Dallas, TX, United States                | Sub-Investigator                                        |                                                                                            |  |
| Javier                            | Banchs     |                       |                  | Baylor Research Institute Dallas - Baylor University Medical Center (BUMC) | Dallas, TX, United States                | Sub-Investigator                                        |                                                                                            |  |
| James                             | Black      |                       |                  | Baylor Research Institute Dallas - Baylor University Medical Center (BUMC) | Dallas, TX, United States                | Sub-Investigator                                        |                                                                                            |  |

## Supplemental Online Content: Nonauthor Collaborators

\*Indicates required information. Only first name, last name, and suffix will appear in PubMed.

| *First Name and Middle Initial(s) | *Last Name | *Suffix (eg, Jr, III) | Academic Degrees | Institution                                                                | Location (city, state/province, country) | Role or Contribution, eg, chair, principal investigator | Group (if more than 1 Group listed in the byline) and/or Subgroup (eg, Steering Committee) |  |
|-----------------------------------|------------|-----------------------|------------------|----------------------------------------------------------------------------|------------------------------------------|---------------------------------------------------------|--------------------------------------------------------------------------------------------|--|
| Peter                             | Cheung     |                       |                  | Baylor Research Institute Dallas - Baylor University Medical Center (BUMC) | Dallas, TX, United States                | Sub-Investigator                                        |                                                                                            |  |
| Alan                              | Donsky     |                       |                  | Baylor Research Institute Dallas - Baylor University Medical Center (BUMC) | Dallas, TX, United States                | Sub-Investigator                                        |                                                                                            |  |
| Dion                              | Graybeal   |                       |                  | Baylor Research Institute Dallas - Baylor University Medical Center (BUMC) | Dallas, TX, United States                | Sub-Investigator                                        |                                                                                            |  |

## Supplemental Online Content: Nonauthor Collaborators

\*Indicates required information. Only first name, last name, and suffix will appear in PubMed.

| *First Name and Middle Initial(s) | *Last Name | *Suffix (eg, Jr, III) | Academic Degrees | Institution                                                                | Location (city, state/province, country) | Role or Contribution, eg, chair, principal investigator | Group (if more than 1 Group listed in the byline) and/or Subgroup (eg, Steering Committee) |  |
|-----------------------------------|------------|-----------------------|------------------|----------------------------------------------------------------------------|------------------------------------------|---------------------------------------------------------|--------------------------------------------------------------------------------------------|--|
| Rashedul                          | Hasan      |                       |                  | Baylor Research Institute Dallas - Baylor University Medical Center (BUMC) | Dallas, TX, United States                | Principal Investigator                                  |                                                                                            |  |
| Osman                             | Mir        |                       |                  | Baylor Research Institute Dallas - Baylor University Medical Center (BUMC) | Dallas, TX, United States                | Sub-Investigator                                        |                                                                                            |  |
| Claude                            | Nguyen     |                       |                  | Baylor Research Institute Dallas - Baylor University Medical Center (BUMC) | Dallas, TX, United States                | Sub-Investigator                                        |                                                                                            |  |

Supplemental Online Content: Nonauthor Collaborators

\*Indicates required information. Only first name, last name, and suffix will appear in PubMed.

| *First Name and Middle Initial(s) | *Last Name | *Suffix (eg, Jr, III) | Academic Degrees | Institution                                                                | Location (city, state/province, country) | Role or Contribution, eg, chair, principal investigator | Group (if more than 1 Group listed in the byline) and/or Subgroup (eg, Steering Committee) |  |
|-----------------------------------|------------|-----------------------|------------------|----------------------------------------------------------------------------|------------------------------------------|---------------------------------------------------------|--------------------------------------------------------------------------------------------|--|
| Gregory                           | Olsovsky   |                       |                  | Baylor Research Institute Dallas - Baylor University Medical Center (BUMC) | Dallas, TX, United States                | Sub-Investigator                                        |                                                                                            |  |
| Jennifer                          | Rasmussen  |                       |                  | Baylor Research Institute Dallas - Baylor University Medical Center (BUMC) | Dallas, TX, United States                | Sub-Investigator                                        |                                                                                            |  |
| Sanjeev                           | Hasabnis   |                       |                  | Cardiovascular Associates of the Southeast                                 | Birmingham, AL, United States            | Sub-Investigator                                        |                                                                                            |  |
| Russell                           | Reeves     |                       |                  | Cardiovascular Associates of the Southeast                                 | Birmingham, AL, United States            | Principal Investigator                                  |                                                                                            |  |
| Chris                             | Rowley     |                       |                  | Cardiovascular Associates of the Southeast                                 | Birmingham, AL, United States            | Former PI                                               |                                                                                            |  |

## Supplemental Online Content: Nonauthor Collaborators

\*Indicates required information. Only first name, last name, and suffix will appear in PubMed.

| *First Name and Middle Initial(s) | *Last Name | *Suffix (eg, Jr, III) | Academic Degrees | Institution                                           | Location (city, state/province, country) | Role or Contribution, eg, chair, principal investigator | Group (if more than 1 Group listed in the byline) and/or Subgroup (eg, Steering Committee) |  |
|-----------------------------------|------------|-----------------------|------------------|-------------------------------------------------------|------------------------------------------|---------------------------------------------------------|--------------------------------------------------------------------------------------------|--|
| Jitendra                          | Sharma     |                       |                  | Cardiovascular Associates of the Southeast            | Birmingham, AL, United States            | Sub-Investigator                                        |                                                                                            |  |
| Macey                             | Smith      |                       |                  | Cardiovascular Associates of the Southeast            | Birmingham, AL, United States            | Sub-Investigator                                        |                                                                                            |  |
| Kay                               | Bonyak     |                       |                  | Centra Medical Group Stroobants Cardiovascular Center | Lynchburg, VA, United States             | Sub-Investigator                                        |                                                                                            |  |
| Matthew                           | Sackett    |                       |                  | Centra Medical Group Stroobants Cardiovascular Center | Lynchburg, VA, United States             | Principal Investigator                                  |                                                                                            |  |
| James                             | Allred     |                       |                  | Cone Health                                           | Greensboro, NC, United States            | Sub-Investigator                                        |                                                                                            |  |
| Pramod                            | Sethi      |                       |                  | Cone Health                                           | Greensboro, NC, United States            | Principal Investigator                                  |                                                                                            |  |
| Richard                           | Jung       |                       |                  | Cox Medical Center South                              | Springfield, MO, United States           | Principal Investigator                                  |                                                                                            |  |

## Supplemental Online Content: Nonauthor Collaborators

\*Indicates required information. Only first name, last name, and suffix will appear in PubMed.

| *First Name and Middle Initial(s) | *Last Name  | *Suffix (eg, Jr, III) | Academic Degrees | Institution                          | Location (city, state/province, country) | Role or Contribution, eg, chair, principal investigator | Group (if more than 1 Group listed in the byline) and/or Subgroup (eg, Steering Committee) |  |
|-----------------------------------|-------------|-----------------------|------------------|--------------------------------------|------------------------------------------|---------------------------------------------------------|--------------------------------------------------------------------------------------------|--|
| Jennifer                          | Lynch       |                       |                  | Cox Medical Center South             | Springfield, MO, United States           | Principal Investigator                                  |                                                                                            |  |
| Steven                            | Rowe        |                       |                  | Cox Medical Center South             | Springfield, MO, United States           | Sub-Investigator                                        |                                                                                            |  |
| Subasini                          | Dash        |                       |                  | Hackensack University Medical Center | Hackensack, NJ, United States            | Principal Investigator                                  |                                                                                            |  |
| Taya                              | Glotzer     |                       |                  | Hackensack University Medical Center | Hackensack, NJ, United States            | Sub-Investigator                                        |                                                                                            |  |
| Sameer                            | Jamal       |                       |                  | Hackensack University Medical Center | Hackensack, NJ, United States            | Sub-Investigator                                        |                                                                                            |  |
| Glauco                            | Radoslovich |                       |                  | Hackensack University Medical Center | Hackensack, NJ, United States            | Sub-Investigator                                        |                                                                                            |  |
| Gunjan                            | Shukla      |                       |                  | Hackensack University Medical Center | Hackensack, NJ, United States            | Sub-Investigator                                        |                                                                                            |  |



## Supplemental Online Content: Nonauthor Collaborators

\*Indicates required information. Only first name, last name, and suffix will appear in PubMed.

| *First Name and Middle Initial(s) | *Last Name | *Suffix (eg, Jr, III) | Academic Degrees | Institution                                    | Location (city, state/province, country) | Role or Contribution, eg, chair, principal investigator | Group (if more than 1 Group listed in the byline) and/or Subgroup (eg, Steering Committee) |  |
|-----------------------------------|------------|-----------------------|------------------|------------------------------------------------|------------------------------------------|---------------------------------------------------------|--------------------------------------------------------------------------------------------|--|
| John                              | Zimmerman  |                       |                  | Hackensack University Medical Center           | Hackensack, NJ, United States            | Sub-Investigator                                        |                                                                                            |  |
| Haitham                           | Hussein    |                       |                  | HealthPartners Institute (Bloomington MN)      | Bloomington, MN, United States           | Principal Investigator                                  |                                                                                            |  |
| Dennis                            | Zhu        |                       |                  | HealthPartners Institute (Bloomington MN)      | Bloomington, MN, United States           | Sub-Investigator                                        |                                                                                            |  |
| Kristopher                        | Krueger    |                       |                  | HealthPartners Institute (Saint Louis Park MN) | Saint Louis Park, MN, United States      | Sub-Investigator                                        |                                                                                            |  |
| Matthew                           | Ostrander  |                       |                  | HealthPartners Institute (Saint Louis Park MN) | Saint Louis Park, MN, United States      | Principal Investigator                                  |                                                                                            |  |
| Darwin                            | Ramirez    |                       |                  | HealthPartners Institute (Saint Louis Park MN) | Saint Louis Park, MN, United States      | Principal Investigator                                  |                                                                                            |  |

## Supplemental Online Content: Nonauthor Collaborators

\*Indicates required information. Only first name, last name, and suffix will appear in PubMed.

| *First Name and Middle Initial(s) | *Last Name | *Suffix (eg, Jr, III) | Academic Degrees | Institution                                    | Location (city, state/province, country) | Role or Contribution, eg, chair, principal investigator | Group (if more than 1 Group listed in the byline) and/or Subgroup (eg, Steering Committee) |  |
|-----------------------------------|------------|-----------------------|------------------|------------------------------------------------|------------------------------------------|---------------------------------------------------------|--------------------------------------------------------------------------------------------|--|
| Jeffrey                           | Shultz     |                       |                  | HealthPartners Institute (Saint Louis Park MN) | Saint Louis Park, MN, United States      | Sub-Investigator                                        |                                                                                            |  |
| Jay                               | Simonson   |                       |                  | HealthPartners Institute (Saint Louis Park MN) | Saint Louis Park, MN, United States      | Sub-Investigator                                        |                                                                                            |  |
| Brett                             | Cucchiara  |                       |                  | Hospital of the University of Pennsylvania     | Philadelphia, PA, United States          | Sub-Investigator                                        |                                                                                            |  |
| Rajat                             | Deo        |                       |                  | Hospital of the University of Pennsylvania     | Philadelphia, PA, United States          | Sub-Investigator                                        |                                                                                            |  |
| David                             | Frankel    |                       |                  | Hospital of the University of Pennsylvania     | Philadelphia, PA, United States          | Sub-Investigator                                        |                                                                                            |  |

## Supplemental Online Content: Nonauthor Collaborators

\*Indicates required information. Only first name, last name, and suffix will appear in PubMed.

| *First Name and Middle Initial(s) | *Last Name | *Suffix (eg, Jr, III) | Academic Degrees | Institution                                | Location (city, state/province, country) | Role or Contribution, eg, chair, principal investigator | Group (if more than 1 Group listed in the byline) and/or Subgroup (eg, Steering Committee) |  |
|-----------------------------------|------------|-----------------------|------------------|--------------------------------------------|------------------------------------------|---------------------------------------------------------|--------------------------------------------------------------------------------------------|--|
| Judy                              | Jia        |                       |                  | Hospital of the University of Pennsylvania | Philadelphia, PA, United States          | Sub-Investigator                                        |                                                                                            |  |
| Scott                             | Kasner     |                       |                  | Hospital of the University of Pennsylvania | Philadelphia, PA, United States          | Principal Investigator                                  |                                                                                            |  |
| Jeanie                            | Luciano    |                       |                  | Hospital of the University of Pennsylvania | Philadelphia, PA, United States          | Sub-Investigator                                        |                                                                                            |  |
| Steven                            | Messe      |                       |                  | Hospital of the University of Pennsylvania | Philadelphia, PA, United States          | Sub-Investigator                                        |                                                                                            |  |
| Michael                           | Mullen     |                       |                  | Hospital of the University of Pennsylvania | Philadelphia, PA, United States          | Sub-Investigator                                        |                                                                                            |  |

## Supplemental Online Content: Nonauthor Collaborators

\*Indicates required information. Only first name, last name, and suffix will appear in PubMed.

| *First Name and Middle Initial(s) | *Last Name | *Suffix (eg, Jr, III) | Academic Degrees | Institution                                | Location (city, state/province, country) | Role or Contribution, eg, chair, principal investigator | Group (if more than 1 Group listed in the byline) and/or Subgroup (eg, Steering Committee) |  |
|-----------------------------------|------------|-----------------------|------------------|--------------------------------------------|------------------------------------------|---------------------------------------------------------|--------------------------------------------------------------------------------------------|--|
| Pasquale                          | Santangeli |                       |                  | Hospital of the University of Pennsylvania | Philadelphia, PA, United States          | Sub-Investigator                                        |                                                                                            |  |
| Robert                            | Schaller   |                       |                  | Hospital of the University of Pennsylvania | Philadelphia, PA, United States          | Sub-Investigator                                        |                                                                                            |  |
| Qingyang                          | Yuan       |                       |                  | Hospital of the University of Pennsylvania | Philadelphia, PA, United States          | Sub-Investigator                                        |                                                                                            |  |
| Don                               | Bledsoe    |                       |                  | Houston Methodist Hospital                 | Houston,TX, United States                | Sub-Investigator                                        |                                                                                            |  |
| Christian                         | Cajavilca  |                       |                  | Houston Methodist Hospital                 | Houston,TX, United States                | Sub-Investigator                                        |                                                                                            |  |
| David                             | Chiu       |                       |                  | Houston Methodist Hospital                 | Houston,TX, United States                | Sub-Investigator                                        |                                                                                            |  |
| Rajan                             | Gadhia     |                       |                  | Houston Methodist Hospital                 | Houston,TX, United States                | Sub-Investigator                                        |                                                                                            |  |
| Maranda Randi                     | Grimes     |                       |                  | Houston Methodist Hospital                 | Houston,TX, United States                | Sub-Investigator                                        |                                                                                            |  |

## Supplemental Online Content: Nonauthor Collaborators

\*Indicates required information. Only first name, last name, and suffix will appear in PubMed.

| *First Name and Middle Initial(s) | *Last Name | *Suffix (eg, Jr, III) | Academic Degrees | Institution                             | Location (city, state/province, country) | Role or Contribution, eg, chair, principal investigator | Group (if more than 1 Group listed in the byline) and/or Subgroup (eg, Steering Committee) |  |
|-----------------------------------|------------|-----------------------|------------------|-----------------------------------------|------------------------------------------|---------------------------------------------------------|--------------------------------------------------------------------------------------------|--|
| Larry                             | Katz       |                       |                  | Houston Methodist Hospital              | Houston,TX, United States                | Sub-Investigator                                        |                                                                                            |  |
| Stacy                             | Moye       |                       |                  | Houston Methodist Hospital              | Houston,TX, United States                | Sub-Investigator                                        |                                                                                            |  |
| Tapan                             | Rami       |                       |                  | Houston Methodist Hospital              | Houston,TX, United States                | Sub-Investigator                                        |                                                                                            |  |
| Abraham                           | Thomas     |                       |                  | Houston Methodist Hospital              | Houston,TX, United States                | Sub-Investigator                                        |                                                                                            |  |
| John                              | Volpi      |                       |                  | Houston Methodist Hospital              | Houston,TX, United States                | Principal Investigator                                  |                                                                                            |  |
| Ali                               | Al Balushi |                       |                  | Icahn School of Medicine at Mount Sinai | New York, NY, United States              | Sub-Investigator                                        |                                                                                            |  |
| Clara                             | Boyd       |                       |                  | Icahn School of Medicine at Mount Sinai | New York, NY, United States              | Sub-Investigator                                        |                                                                                            |  |
| Subbarao                          | Choudry    |                       |                  | Icahn School of Medicine at Mount Sinai | New York, NY, United States              | Sub-Investigator                                        |                                                                                            |  |

## Supplemental Online Content: Nonauthor Collaborators

\*Indicates required information. Only first name, last name, and suffix will appear in PubMed.

| *First Name and Middle Initial(s) | *Last Name | *Suffix (eg, Jr, III) | Academic Degrees | Institution                             | Location (city, state/province, country) | Role or Contribution, eg, chair, principal investigator | Group (if more than 1 Group listed in the byline) and/or Subgroup (eg, Steering Committee) |  |
|-----------------------------------|------------|-----------------------|------------------|-----------------------------------------|------------------------------------------|---------------------------------------------------------|--------------------------------------------------------------------------------------------|--|
| Mandip                            | Dhamoon    |                       |                  | Icahn School of Medicine at Mount Sinai | New York, NY, United States              | Principal Investigator                                  |                                                                                            |  |
| Srinivas                          | Dukkipati  |                       |                  | Icahn School of Medicine at Mount Sinai | New York, NY, United States              | Sub-Investigator                                        |                                                                                            |  |
| Davida                            | Goltz      |                       |                  | Icahn School of Medicine at Mount Sinai | New York, NY, United States              | Sub-Investigator                                        |                                                                                            |  |
| Qing                              | Hao        |                       |                  | Icahn School of Medicine at Mount Sinai | New York, NY, United States              | Sub-Investigator                                        |                                                                                            |  |
| Deborah                           | Horowitz   |                       |                  | Icahn School of Medicine at Mount Sinai | New York, NY, United States              | Sub-Investigator                                        |                                                                                            |  |
| Gurmeen                           | Kaur       |                       |                  | Icahn School of Medicine at Mount Sinai | New York, NY, United States              | Sub-Investigator                                        |                                                                                            |  |

## Supplemental Online Content: Nonauthor Collaborators

\*Indicates required information. Only first name, last name, and suffix will appear in PubMed.

| *First Name and Middle Initial(s) | *Last Name | *Suffix (eg, Jr, III) | Academic Degrees | Institution                             | Location (city, state/province, country) | Role or Contribution, eg, chair, principal investigator | Group (if more than 1 Group listed in the byline) and/or Subgroup (eg, Steering Committee) |  |
|-----------------------------------|------------|-----------------------|------------------|-----------------------------------------|------------------------------------------|---------------------------------------------------------|--------------------------------------------------------------------------------------------|--|
| Jacob                             | Koruth     |                       |                  | Icahn School of Medicine at Mount Sinai | New York, NY, United States              | Sub-Investigator                                        |                                                                                            |  |
| Christeena                        | Kurian     |                       |                  | Icahn School of Medicine at Mount Sinai | New York, NY, United States              | Sub-Investigator                                        |                                                                                            |  |
| Marie-Noelle                      | Langan     |                       |                  | Icahn School of Medicine at Mount Sinai | New York, NY, United States              | Sub-Investigator                                        |                                                                                            |  |
| Ivan                              | Matos Diaz |                       |                  | Icahn School of Medicine at Mount Sinai | New York, NY, United States              | Sub-Investigator                                        |                                                                                            |  |
| Marc                              | Miller     |                       |                  | Icahn School of Medicine at Mount Sinai | New York, NY, United States              | Sub-Investigator/Implanter                              |                                                                                            |  |
| Vivek                             | Reddy      |                       |                  | Icahn School of Medicine at Mount Sinai | New York, NY, United States              | Sub-Investigator                                        |                                                                                            |  |

## Supplemental Online Content: Nonauthor Collaborators

\*Indicates required information. Only first name, last name, and suffix will appear in PubMed.

| *First Name and Middle Initial(s) | *Last Name | *Suffix (eg, Jr, III) | Academic Degrees | Institution                             | Location (city, state/province, country) | Role or Contribution, eg, chair, principal investigator | Group (if more than 1 Group listed in the byline) and/or Subgroup (eg, Steering Committee) |  |
|-----------------------------------|------------|-----------------------|------------------|-----------------------------------------|------------------------------------------|---------------------------------------------------------|--------------------------------------------------------------------------------------------|--|
| Kara                              | Sheinart   |                       |                  | Icahn School of Medicine at Mount Sinai | New York, NY, United States              | Sub-Investigator                                        |                                                                                            |  |
| Laura                             | Stein      |                       |                  | Icahn School of Medicine at Mount Sinai | New York, NY, United States              | Sub-Investigator                                        |                                                                                            |  |
| Aaron                             | Tansy      |                       |                  | Icahn School of Medicine at Mount Sinai | New York, NY, United States              | Sub-Investigator                                        |                                                                                            |  |
| Stanley                           | Tuhrim     |                       |                  | Icahn School of Medicine at Mount Sinai | New York, NY, United States              | Sub-Investigator                                        |                                                                                            |  |
| Jesse                             | Weinberger |                       |                  | Icahn School of Medicine at Mount Sinai | New York, NY, United States              | Sub-Investigator                                        |                                                                                            |  |
| William                           | Whang      |                       |                  | Icahn School of Medicine at Mount Sinai | New York, NY, United States              | Sub-Investigator                                        |                                                                                            |  |



## Supplemental Online Content: Nonauthor Collaborators

\*Indicates required information. Only first name, last name, and suffix will appear in PubMed.

| *First Name and Middle Initial(s) | *Last Name | *Suffix (eg, Jr, III) | Academic Degrees | Institution                                  | Location (city, state/province, country) | Role or Contribution, eg, chair, principal investigator | Group (if more than 1 Group listed in the byline) and/or Subgroup (eg, Steering Committee) |  |
|-----------------------------------|------------|-----------------------|------------------|----------------------------------------------|------------------------------------------|---------------------------------------------------------|--------------------------------------------------------------------------------------------|--|
| Jonathan                          | Cross      |                       |                  | Innovative Medical Research of South Florida | Miami, FL, United States                 | Sub-Investigator                                        |                                                                                            |  |
| Howard                            | Kreger     |                       |                  | Innovative Medical Research of South Florida | Miami, FL, United States                 | Principal Investigator                                  |                                                                                            |  |
| Marc                              | Saltzman   |                       |                  | Innovative Medical Research of South Florida | Miami, FL, United States                 | Sub-Investigator                                        |                                                                                            |  |
| Kenneth                           | Zide       |                       |                  | Innovative Medical Research of South Florida | Miami, FL, United States                 | Sub-Investigator                                        |                                                                                            |  |
| Sandeep                           | Bansal     |                       |                  | Lancaster General Hospital                   | Lancaster, PA , United States            | Principal Investigator                                  |                                                                                            |  |
| Matthew                           | Bernabei   |                       |                  | Lancaster General Hospital                   | Lancaster, PA , United States            | Sub-Investigator                                        |                                                                                            |  |
| Murray                            | Flaster    |                       |                  | Lancaster General Hospital                   | Lancaster, PA , United States            | Principal Investigator                                  |                                                                                            |  |
| Conor                             | Barrett    |                       |                  | Massachusetts General Hospital               | Boston, MA, United States                | Sub-Investigator                                        |                                                                                            |  |

## Supplemental Online Content: Nonauthor Collaborators

\*Indicates required information. Only first name, last name, and suffix will appear in PubMed.

| *First Name and Middle Initial(s) | *Last Name  | *Suffix (eg, Jr, III) | Academic Degrees | Institution                    | Location (city, state/province, country) | Role or Contribution, eg, chair, principal investigator | Group (if more than 1 Group listed in the byline) and/or Subgroup (eg, Steering Committee) |  |
|-----------------------------------|-------------|-----------------------|------------------|--------------------------------|------------------------------------------|---------------------------------------------------------|--------------------------------------------------------------------------------------------|--|
| Mark                              | Etherton    |                       |                  | Massachusetts General Hospital | Boston, MA, United States                | Sub-Investigator                                        |                                                                                            |  |
| E. Kevin                          | Heist       |                       |                  | Massachusetts General Hospital | Boston, MA, United States                | Sub-Investigator                                        |                                                                                            |  |
| Steven                            | Lubitz      |                       |                  | Massachusetts General Hospital | Boston, MA, United States                | Sub-Investigator                                        |                                                                                            |  |
| Robert                            | Regenhardt  |                       |                  | Massachusetts General Hospital | Boston, MA, United States                | Sub-Investigator                                        |                                                                                            |  |
| Richa                             | Sharma      |                       |                  | Massachusetts General Hospital | Boston, MA, United States                | Sub-Investigator                                        |                                                                                            |  |
| Scott                             | Silverman   |                       |                  | Massachusetts General Hospital | Boston, MA, United States                | Principal Investigator                                  |                                                                                            |  |
| Kelly                             | Sloane      |                       |                  | Massachusetts General Hospital | Boston, MA, United States                | Sub-Investigator                                        |                                                                                            |  |
| Anand                             | Viswanathan |                       |                  | Massachusetts General Hospital | Boston, MA, United States                | Sub-Investigator                                        |                                                                                            |  |

Supplemental Online Content: Nonauthor Collaborators

\*Indicates required information. Only first name, last name, and suffix will appear in PubMed.

| *First Name and Middle Initial(s) | *Last Name | *Suffix (eg, Jr, III) | Academic Degrees | Institution                     | Location (city, state/province, country) | Role or Contribution, eg, chair, principal investigator | Group (if more than 1 Group listed in the byline) and/or Subgroup (eg, Steering Committee) |  |
|-----------------------------------|------------|-----------------------|------------------|---------------------------------|------------------------------------------|---------------------------------------------------------|--------------------------------------------------------------------------------------------|--|
| Amit                              | Doshi      |                       |                  | Mercy Hospital Saint Louis      | St. Louis, MO, United States             | Sub-Investigator                                        |                                                                                            |  |
| William                           | Logan      |                       |                  | Mercy Hospital Saint Louis      | St. Louis, MO, United States             | Sub-Investigator                                        |                                                                                            |  |
| Maheen                            | Malik      |                       |                  | Mercy Hospital Saint Louis      | St. Louis, MO, United States             | Sub-Investigator                                        |                                                                                            |  |
| David                             | Rempe      |                       |                  | Mercy Hospital Saint Louis      | St. Louis, MO, United States             | Principal Investigator                                  |                                                                                            |  |
| Rohan                             | Arora      |                       |                  | North Shore University Hospital | Manhasset, NY, United States             | Sub-Investigator                                        |                                                                                            |  |
| Stuart                            | Beldner    |                       |                  | North Shore University Hospital | Manhasset, NY, United States             | Sub-Investigator                                        |                                                                                            |  |
| Laurence                          | Epstein    |                       |                  | North Shore University Hospital | Manhasset, NY, United States             | Sub-Investigator                                        |                                                                                            |  |
| Haisam                            | Ismail     |                       |                  | North Shore University Hospital | Manhasset, NY, United States             | Sub-Investigator                                        |                                                                                            |  |

## Supplemental Online Content: Nonauthor Collaborators

\*Indicates required information. Only first name, last name, and suffix will appear in PubMed.

| *First Name and Middle Initial(s) | *Last Name | *Suffix (eg, Jr, III) | Academic Degrees | Institution                     | Location (city, state/province, country) | Role or Contribution, eg, chair, principal investigator | Group (if more than 1 Group listed in the byline) and/or Subgroup (eg, Steering Committee) |  |
|-----------------------------------|------------|-----------------------|------------------|---------------------------------|------------------------------------------|---------------------------------------------------------|--------------------------------------------------------------------------------------------|--|
| Ram                               | Jadonath   |                       |                  | North Shore University Hospital | Manhasset, NY, United States             | Sub-Investigator                                        |                                                                                            |  |
| Jeffrey                           | Katz       |                       |                  | North Shore University Hospital | Manhasset, NY, United States             | Principal Investigator                                  |                                                                                            |  |
| Richard                           | Libman     |                       |                  | North Shore University Hospital | Manhasset, NY, United States             | Sub-Investigator                                        |                                                                                            |  |
| Mohammad                          | Moussavi   |                       |                  | North Shore University Hospital | Manhasset, NY, United States             | Sub-Investigator                                        |                                                                                            |  |
| Anand                             | Patel      |                       |                  | North Shore University Hospital | Manhasset, NY, United States             | Sub-Investigator                                        |                                                                                            |  |
| Apoor                             | Patel      |                       |                  | North Shore University Hospital | Manhasset, NY, United States             | Sub-Investigator                                        |                                                                                            |  |
| Jonathan                          | Willner    |                       |                  | North Shore University Hospital | Manhasset, NY, United States             | Sub-Investigator                                        |                                                                                            |  |
| Paul                              | Wright     |                       |                  | North Shore University Hospital | Manhasset, NY, United States             | Principal Investigator                                  |                                                                                            |  |

## Supplemental Online Content: Nonauthor Collaborators

\*Indicates required information. Only first name, last name, and suffix will appear in PubMed.

| *First Name and Middle Initial(s) | *Last Name | *Suffix (eg, Jr, III) | Academic Degrees | Institution                   | Location (city, state/province, country) | Role or Contribution, eg, chair, principal investigator | Group (if more than 1 Group listed in the byline) and/or Subgroup (eg, Steering Committee) |  |
|-----------------------------------|------------|-----------------------|------------------|-------------------------------|------------------------------------------|---------------------------------------------------------|--------------------------------------------------------------------------------------------|--|
| Frances                           | Caprio     |                       |                  | Northwestern University       | Evanston, IL, United States              | Principal Investigator                                  |                                                                                            |  |
| Susan                             | Kim        |                       |                  | Northwestern University       | Evanston, IL, United States              | Sub-Investigator                                        |                                                                                            |  |
| Scott                             | Mendelson  |                       |                  | Northwestern University       | Evanston, IL, United States              | Sub-Investigator                                        |                                                                                            |  |
| Rod                               | Passman    |                       |                  | Northwestern University       | Evanston, IL, United States              | Sub-Investigator                                        |                                                                                            |  |
| Ilana                             | Ruff       |                       |                  | Northwestern University       | Evanston, IL, United States              | Sub-Investigator                                        |                                                                                            |  |
| Mohammad                          | Alsorogi   |                       |                  | Norton Neuroscience Institute | Louisville, KY, United States            | Sub-Investigator                                        |                                                                                            |  |
| Gauhar                            | Chaudhary  |                       |                  | Norton Neuroscience Institute | Louisville, KY, United States            | Sub-Investigator                                        |                                                                                            |  |
| Kent                              | Morris     |                       |                  | Norton Neuroscience Institute | Louisville, KY, United States            | Sub-Investigator                                        |                                                                                            |  |
| Savannah                          | Mullins    |                       |                  | Norton Neuroscience Institute | Louisville, KY, United States            | Sub-Investigator                                        |                                                                                            |  |

## Supplemental Online Content: Nonauthor Collaborators

\*Indicates required information. Only first name, last name, and suffix will appear in PubMed.

| *First Name and Middle Initial(s) | *Last Name | *Suffix (eg, Jr, III) | Academic Degrees | Institution                   | Location (city, state/province, country) | Role or Contribution, eg, chair, principal investigator | Group (if more than 1 Group listed in the byline) and/or Subgroup (eg, Steering Committee) |  |
|-----------------------------------|------------|-----------------------|------------------|-------------------------------|------------------------------------------|---------------------------------------------------------|--------------------------------------------------------------------------------------------|--|
| Nadeem                            | Talpur     |                       |                  | Norton Neuroscience Institute | Louisville, KY, United States            | Principal Investigator                                  |                                                                                            |  |
| Kevin                             | Thomas     |                       |                  | Norton Neuroscience Institute | Louisville, KY, United States            | Sub-Investigator                                        |                                                                                            |  |
| Breehan                           | Chancellor |                       |                  | NYU Langone Medical Center    | New York, NY, United States              | Sub-Investigator                                        |                                                                                            |  |
| Larry                             | Chinitz    |                       |                  | NYU Langone Medical Center    | New York, NY, United States              | Sub-Investigator                                        |                                                                                            |  |
| Andre                             | Culpepper  |                       |                  | NYU Langone Medical Center    | New York, NY, United States              | Sub-Investigator                                        |                                                                                            |  |
| Michael                           | Fara       |                       |                  | NYU Langone Medical Center    | New York, NY, United States              | Sub-Investigator                                        |                                                                                            |  |
| Koto                              | Ishida     |                       |                  | NYU Langone Medical Center    | New York, NY, United States              | Principal Investigator                                  |                                                                                            |  |
| Kaitlyn                           | Lillemoe   |                       |                  | NYU Langone Medical Center    | New York, NY, United States              | Sub-Investigator                                        |                                                                                            |  |

## Supplemental Online Content: Nonauthor Collaborators

\*Indicates required information. Only first name, last name, and suffix will appear in PubMed.

| *First Name and Middle Initial(s) | *Last Name | *Suffix (eg, Jr, III) | Academic Degrees | Institution                | Location (city, state/province, country) | Role or Contribution, eg, chair, principal investigator | Group (if more than 1 Group listed in the byline) and/or Subgroup (eg, Steering Committee) |  |
|-----------------------------------|------------|-----------------------|------------------|----------------------------|------------------------------------------|---------------------------------------------------------|--------------------------------------------------------------------------------------------|--|
| Aaron                             | Lord       |                       |                  | NYU Langone Medical Center | New York, NY, United States              | Sub-Investigator                                        |                                                                                            |  |
| Jose                              | Torres     |                       |                  | NYU Langone Medical Center | New York, NY, United States              | Sub-Investigator                                        |                                                                                            |  |
| Cen                               | Zhang      |                       |                  | NYU Langone Medical Center | New York, NY, United States              | Sub-Investigator                                        |                                                                                            |  |
| Freddy                            | Abi-Samra  |                       |                  | Ochsner Medical Center     | New Orleans, LA, United States           | Sub-Investigator                                        |                                                                                            |  |
| Michael                           | Bernard    |                       |                  | Ochsner Medical Center     | New Orleans, LA, United States           | Sub-Investigator                                        |                                                                                            |  |
| Jacqueline                        | Carter     |                       |                  | Ochsner Medical Center     | New Orleans, LA, United States           | Sub-Investigator                                        |                                                                                            |  |
| Himanshu                          | Chokhawala |                       |                  | Ochsner Medical Center     | New Orleans, LA, United States           | Sub-Investigator                                        |                                                                                            |  |
| Amanda                            | Downey     |                       |                  | Ochsner Medical Center     | New Orleans, LA, United States           | Sub-Investigator                                        |                                                                                            |  |
| Samuel                            | Khatib     |                       |                  | Ochsner Medical Center     | New Orleans, LA, United States           | Sub-Investigator                                        |                                                                                            |  |
| Daniel                            | Morin      |                       |                  | Ochsner Medical Center     | New Orleans, LA, United States           | Sub-Investigator                                        |                                                                                            |  |

## Supplemental Online Content: Nonauthor Collaborators

\*Indicates required information. Only first name, last name, and suffix will appear in PubMed.

| *First Name and Middle Initial(s) | *Last Name   | *Suffix (eg, Jr, III) | Academic Degrees | Institution             | Location (city, state/province, country) | Role or Contribution, eg, chair, principal investigator | Group (if more than 1 Group listed in the byline) and/or Subgroup (eg, Steering Committee) |  |
|-----------------------------------|--------------|-----------------------|------------------|-------------------------|------------------------------------------|---------------------------------------------------------|--------------------------------------------------------------------------------------------|--|
| Glenn                             | Polin        |                       |                  | Ochsner Medical Center  | New Orleans, LA, United States           | Sub-Investigator                                        |                                                                                            |  |
| Paul                              | Rogers       |                       |                  | Ochsner Medical Center  | New Orleans, LA, United States           | Sub-Investigator                                        |                                                                                            |  |
| Gabriel                           | Vidal        |                       |                  | Ochsner Medical Center  | New Orleans, LA, United States           | Sub-Investigator                                        |                                                                                            |  |
| Richard                           | Zweifler     |                       |                  | Ochsner Medical Center  | New Orleans, LA, United States           | Principal Investigator                                  |                                                                                            |  |
| Gary                              | Belt         |                       |                  | Overlook Medical Center | Summit, NJ, United States                | Sub-Investigator                                        |                                                                                            |  |
| Robert                            | Felberg      |                       |                  | Overlook Medical Center | Summit, NJ, United States                | Principal Investigator                                  |                                                                                            |  |
| Steve                             | Furer        |                       |                  | Overlook Medical Center | Summit, NJ, United States                | Sub-Investigator                                        |                                                                                            |  |
| John                              | Hanna        |                       |                  | Overlook Medical Center | Summit, NJ, United States                | Sub-Investigator                                        |                                                                                            |  |
| Angela                            | McCall-Brown |                       |                  | Overlook Medical Center | Summit, NJ, United States                | Sub-Investigator                                        |                                                                                            |  |
| Susan                             | Seeger       |                       |                  | Overlook Medical Center | Summit, NJ, United States                | Sub-Investigator                                        |                                                                                            |  |



## Supplemental Online Content: Nonauthor Collaborators

\*Indicates required information. Only first name, last name, and suffix will appear in PubMed.

| *First Name and Middle Initial(s) | *Last Name | *Suffix (eg, Jr, III) | Academic Degrees | Institution                                          | Location (city, state/province, country) | Role or Contribution, eg, chair, principal investigator | Group (if more than 1 Group listed in the byline) and/or Subgroup (eg, Steering Committee) |  |
|-----------------------------------|------------|-----------------------|------------------|------------------------------------------------------|------------------------------------------|---------------------------------------------------------|--------------------------------------------------------------------------------------------|--|
| Ramakota                          | Reddy      |                       |                  | PeaceHealth Sacred Heart Medical Center at Riverbend | Springfield, OR, United States           | Sub-Investigator                                        |                                                                                            |  |
| Elaine                            | Skalabrin  |                       |                  | PeaceHealth Sacred Heart Medical Center at Riverbend | Springfield, OR, United States           | Principal Investigator                                  |                                                                                            |  |
| Diane                             | Soik       |                       |                  | PeaceHealth Sacred Heart Medical Center at Riverbend | Springfield, OR, United States           | Sub-Investigator                                        |                                                                                            |  |
| Michael                           | Wilder     |                       |                  | PeaceHealth Sacred Heart Medical Center at Riverbend | Springfield, OR, United States           | Sub-Investigator                                        |                                                                                            |  |
| Michelle                          | Kearney    |                       |                  | Saint Thomas Research Institute                      | Nashville, TN, United States             | Sub-Investigator                                        |                                                                                            |  |

## Supplemental Online Content: Nonauthor Collaborators

\*Indicates required information. Only first name, last name, and suffix will appear in PubMed.

| *First Name and Middle Initial(s) | *Last Name  | *Suffix (eg, Jr, III) | Academic Degrees | Institution                     | Location (city, state/province, country) | Role or Contribution, eg, chair, principal investigator | Group (if more than 1 Group listed in the byline) and/or Subgroup (eg, Steering Committee) |  |
|-----------------------------------|-------------|-----------------------|------------------|---------------------------------|------------------------------------------|---------------------------------------------------------|--------------------------------------------------------------------------------------------|--|
| Eugene                            | LaFranchise |                       |                  | Saint Thomas Research Institute | Nashville, TN, United States             | Principal Investigator                                  |                                                                                            |  |
| Brett                             | Parker      |                       |                  | Saint Thomas Research Institute | Nashville, TN, United States             | Sub-Investigator                                        |                                                                                            |  |
| Robert Andrew (Drew)              | Pickett     |                       |                  | Saint Thomas Research Institute | Nashville, TN, United States             | Sub-Investigator                                        |                                                                                            |  |
| Heather                           | Bonaguidi   |                       |                  | Scripps Green Hospital          | San Diego, CA, United States             | Sub-Investigator                                        |                                                                                            |  |
| Douglas                           | Gibson      |                       |                  | Scripps Green Hospital          | San Diego, CA, United States             | Sub-Investigator/Implanter                              |                                                                                            |  |
| Mary                              | Kalafut     |                       |                  | Scripps Green Hospital          | San Diego, CA, United States             | Principal Investigator                                  |                                                                                            |  |
| Beth                              | Mattera     |                       |                  | Scripps Green Hospital          | San Diego, CA, United States             | Sub-Investigator                                        |                                                                                            |  |
| Nicholas                          | Olson       |                       |                  | Scripps Green Hospital          | San Diego, CA, United States             | Sub-Investigator/Implanter                              |                                                                                            |  |
| Mary                              | Parker      |                       |                  | Scripps Green Hospital          | San Diego, CA, United States             | Sub-Investigator                                        |                                                                                            |  |
| John                              | Rogers      |                       |                  | Scripps Green Hospital          | San Diego, CA, United States             | Sub-Investigator                                        |                                                                                            |  |

## Supplemental Online Content: Nonauthor Collaborators

\*Indicates required information. Only first name, last name, and suffix will appear in PubMed.

| *First Name and Middle Initial(s) | *Last Name | *Suffix (eg, Jr, III) | Academic Degrees | Institution                                               | Location (city, state/province, country) | Role or Contribution, eg, chair, principal investigator | Group (if more than 1 Group listed in the byline) and/or Subgroup (eg, Steering Committee) |  |
|-----------------------------------|------------|-----------------------|------------------|-----------------------------------------------------------|------------------------------------------|---------------------------------------------------------|--------------------------------------------------------------------------------------------|--|
| Poulina                           | Uddin      |                       |                  | Scripps Green Hospital                                    | San Diego, CA, United States             | Sub-Investigator                                        |                                                                                            |  |
| Cherylee                          | Chang      |                       |                  | The Queen's Medical Center                                | Honolulu, HI, United States              | Former PI                                               |                                                                                            |  |
| Sarah                             | Graner     |                       |                  | The Queen's Medical Center                                | Honolulu, HI, United States              | Sub-Investigator                                        |                                                                                            |  |
| Joseph                            | Kipta      |                       |                  | The Queen's Medical Center                                | Honolulu, HI, United States              | Sub-Investigator                                        |                                                                                            |  |
| Rony                              | Salem      |                       |                  | The Queen's Medical Center                                | Honolulu, HI, United States              | Principal Investigator                                  |                                                                                            |  |
| David                             | Singh      |                       |                  | The Queen's Medical Center                                | Honolulu, HI, United States              | Sub-Investigator/Implanter                              |                                                                                            |  |
| Ahmed                             | Al-Awwad   |                       |                  | The University of Oklahoma Health Sciences Center (OUHSC) | Oklahoma City, OK, United States         | Sub-Investigator                                        |                                                                                            |  |

## Supplemental Online Content: Nonauthor Collaborators

\*Indicates required information. Only first name, last name, and suffix will appear in PubMed.

| *First Name and Middle Initial(s) | *Last Name    | *Suffix (eg, Jr, III) | Academic Degrees | Institution                                               | Location (city, state/province, country) | Role or Contribution, eg, chair, principal investigator | Group (if more than 1 Group listed in the byline) and/or Subgroup (eg, Steering Committee) |  |
|-----------------------------------|---------------|-----------------------|------------------|-----------------------------------------------------------|------------------------------------------|---------------------------------------------------------|--------------------------------------------------------------------------------------------|--|
| Bahar                             | Beaver        |                       |                  | The University of Oklahoma Health Sciences Center (OUHSC) | Oklahoma City, OK, United States         | Sub-Investigator                                        |                                                                                            |  |
| Shuchi                            | Chaudhary     |                       |                  | The University of Oklahoma Health Sciences Center (OUHSC) | Oklahoma City, OK, United States         | Sub-Investigator                                        |                                                                                            |  |
| Stephen                           | Clayton       |                       |                  | The University of Oklahoma Health Sciences Center (OUHSC) | Oklahoma City, OK, United States         | Sub-Investigator                                        |                                                                                            |  |
| Claire                            | Delpirou Nouh |                       |                  | The University of Oklahoma Health Sciences Center (OUHSC) | Oklahoma City, OK, United States         | Sub-Investigator                                        |                                                                                            |  |

Supplemental Online Content: Nonauthor Collaborators

\*Indicates required information. Only first name, last name, and suffix will appear in PubMed.

| *First Name and Middle Initial(s) | *Last Name | *Suffix (eg, Jr, III) | Academic Degrees | Institution                                               | Location (city, state/province, country) | Role or Contribution, eg, chair, principal investigator | Group (if more than 1 Group listed in the byline) and/or Subgroup (eg, Steering Committee) |  |
|-----------------------------------|------------|-----------------------|------------------|-----------------------------------------------------------|------------------------------------------|---------------------------------------------------------|--------------------------------------------------------------------------------------------|--|
| Paul                              | Garabelli  |                       |                  | The University of Oklahoma Health Sciences Center (OUHSC) | Oklahoma City, OK, United States         | Sub-Investigator                                        |                                                                                            |  |
| David                             | Gordon     |                       |                  | The University of Oklahoma Health Sciences Center (OUHSC) | Oklahoma City, OK, United States         | Sub-Investigator                                        |                                                                                            |  |
| Aneesh                            | Pakala     |                       |                  | The University of Oklahoma Health Sciences Center (OUHSC) | Oklahoma City, OK, United States         | Sub-Investigator                                        |                                                                                            |  |
| Bappaditya                        | Ray        |                       |                  | The University of Oklahoma Health Sciences Center (OUHSC) | Oklahoma City, OK, United States         | Sub-Investigator                                        |                                                                                            |  |

## Supplemental Online Content: Nonauthor Collaborators

\*Indicates required information. Only first name, last name, and suffix will appear in PubMed.

| *First Name and Middle Initial(s) | *Last Name | *Suffix (eg, Jr, III) | Academic Degrees | Institution                                               | Location (city, state/province, country) | Role or Contribution, eg, chair, principal investigator | Group (if more than 1 Group listed in the byline) and/or Subgroup (eg, Steering Committee) |  |
|-----------------------------------|------------|-----------------------|------------------|-----------------------------------------------------------|------------------------------------------|---------------------------------------------------------|--------------------------------------------------------------------------------------------|--|
| Scott                             | Saucedo    |                       |                  | The University of Oklahoma Health Sciences Center (OUHSC) | Oklahoma City, OK, United States         | Sub-Investigator                                        |                                                                                            |  |
| Evgeny                            | Sidorov    |                       |                  | The University of Oklahoma Health Sciences Center (OUHSC) | Oklahoma City, OK, United States         | Principal Investigator                                  |                                                                                            |  |
| Stavros                           | Stavrakis  |                       |                  | The University of Oklahoma Health Sciences Center (OUHSC) | Oklahoma City, OK, United States         | Sub-Investigator                                        |                                                                                            |  |
| Marilou                           | Ching      |                       |                  | University at Buffalo, The State University of New York   | Buffalo, NY, United States               | Principal Investigator                                  |                                                                                            |  |

## Supplemental Online Content: Nonauthor Collaborators

\*Indicates required information. Only first name, last name, and suffix will appear in PubMed.

| *First Name and Middle Initial(s) | *Last Name | *Suffix (eg, Jr, III) | Academic Degrees | Institution                                             | Location (city, state/province, country) | Role or Contribution, eg, chair, principal investigator | Group (if more than 1 Group listed in the byline) and/or Subgroup (eg, Steering Committee) |  |
|-----------------------------------|------------|-----------------------|------------------|---------------------------------------------------------|------------------------------------------|---------------------------------------------------------|--------------------------------------------------------------------------------------------|--|
| Christopher                       | Deline     |                       |                  | University at Buffalo, The State University of New York | Buffalo, NY, United States               | Sub-Investigator                                        |                                                                                            |  |
| J. Maurice                        | Hourihane  |                       |                  | University at Buffalo, The State University of New York | Buffalo, NY, United States               | Sub-Investigator                                        |                                                                                            |  |
| Amit                              | Kandel     |                       |                  | University at Buffalo, The State University of New York | Buffalo, NY, United States               | Sub-Investigator                                        |                                                                                            |  |
| Chee                              | Kim        |                       |                  | University at Buffalo, The State University of New York | Buffalo, NY, United States               | Sub-Investigator                                        |                                                                                            |  |

## Supplemental Online Content: Nonauthor Collaborators

\*Indicates required information. Only first name, last name, and suffix will appear in PubMed.

| *First Name and Middle Initial(s) | *Last Name | *Suffix (eg, Jr, III) | Academic Degrees | Institution                                             | Location (city, state/province, country) | Role or Contribution, eg, chair, principal investigator | Group (if more than 1 Group listed in the byline) and/or Subgroup (eg, Steering Committee) |  |
|-----------------------------------|------------|-----------------------|------------------|---------------------------------------------------------|------------------------------------------|---------------------------------------------------------|--------------------------------------------------------------------------------------------|--|
| Rakesh                            | Magun      |                       |                  | University at Buffalo, The State University of New York | Buffalo, NY, United States               | Sub-Investigator                                        |                                                                                            |  |
| Ashkan                            | Mowla      |                       |                  | University at Buffalo, The State University of New York | Buffalo, NY, United States               | Principal Investigator                                  |                                                                                            |  |
| Robert                            | Sawyer     |                       |                  | University at Buffalo, The State University of New York | Buffalo, NY, United States               | Sub-Investigator                                        |                                                                                            |  |
| Donald                            | Switzer    |                       |                  | University at Buffalo, The State University of New York | Buffalo, NY, United States               | Sub-Investigator                                        |                                                                                            |  |



Supplemental Online Content: Nonauthor Collaborators

\*Indicates required information. Only first name, last name, and suffix will appear in PubMed.

| *First Name and Middle Initial(s) | *Last Name | *Suffix (eg, Jr, III) | Academic Degrees | Institution                                                | Location (city, state/province, country) | Role or Contribution, eg, chair, principal investigator | Group (if more than 1 Group listed in the byline) and/or Subgroup (eg, Steering Committee) |  |
|-----------------------------------|------------|-----------------------|------------------|------------------------------------------------------------|------------------------------------------|---------------------------------------------------------|--------------------------------------------------------------------------------------------|--|
| Nitish                            | Badhwar    |                       |                  | University of California San Francisco UCSF Medical Center | San Francisco, CA, United States         | Sub-Investigator                                        |                                                                                            |  |
| Randall                           | Lee        |                       |                  | University of California San Francisco UCSF Medical Center | San Francisco, CA, United States         | Sub-Investigator                                        |                                                                                            |  |
| Karl                              | Meisel     |                       |                  | University of California San Francisco UCSF Medical Center | San Francisco, CA, United States         | Principal Investigator                                  |                                                                                            |  |
| Wade                              | Smith      |                       |                  | University of California San Francisco UCSF Medical Center | San Francisco, CA, United States         | Sub-Investigator                                        |                                                                                            |  |

## Supplemental Online Content: Nonauthor Collaborators

\*Indicates required information. Only first name, last name, and suffix will appear in PubMed.

| *First Name and Middle Initial(s) | *Last Name        | *Suffix (eg, Jr, III) | Academic Degrees | Institution                  | Location (city, state/province, country) | Role or Contribution, eg, chair, principal investigator | Group (if more than 1 Group listed in the byline) and/or Subgroup (eg, Steering Committee) |  |
|-----------------------------------|-------------------|-----------------------|------------------|------------------------------|------------------------------------------|---------------------------------------------------------|--------------------------------------------------------------------------------------------|--|
| Moayd                             | Alkhalifah        |                       |                  | University of Miami Hospital | Miami, FL, United States                 | Sub-Investigator                                        |                                                                                            |  |
| Sushanth                          | Aroor             |                       |                  | University of Miami Hospital | Miami, FL, United States                 | Sub-Investigator                                        |                                                                                            |  |
| Negar                             | Asdaghi           |                       |                  | University of Miami Hospital | Miami, FL, United States                 | Sub-Investigator                                        |                                                                                            |  |
| Nirav                             | Bhatt             |                       |                  | University of Miami Hospital | Miami, FL, United States                 | Sub-Investigator                                        |                                                                                            |  |
| Victor                            | Del Brutto        |                       |                  | University of Miami Hospital | Miami, FL, United States                 | Sub-Investigator                                        |                                                                                            |  |
| George                            | Dillon            |                       |                  | University of Miami Hospital | Miami, FL, United States                 | Sub-Investigator                                        |                                                                                            |  |
| Paul                              | Gadient           |                       |                  | University of Miami Hospital | Miami, FL, United States                 | Sub-Investigator                                        |                                                                                            |  |
| Sebastian                         | Koch              |                       |                  | University of Miami Hospital | Miami, FL, United States                 | Principal Investigator                                  |                                                                                            |  |
| Litsa                             | Lambrakos         |                       |                  | University of Miami Hospital | Miami, FL, United States                 | Sub-Investigator                                        |                                                                                            |  |
| Amer                              | Malik             |                       |                  | University of Miami Hospital | Miami, FL, United States                 | Sub-Investigator                                        |                                                                                            |  |
| Erika                             | Marulanda-Londono |                       |                  | University of Miami Hospital | Miami, FL, United States                 | Sub-Investigator                                        |                                                                                            |  |

## Supplemental Online Content: Nonauthor Collaborators

\*Indicates required information. Only first name, last name, and suffix will appear in PubMed.

| *First Name and Middle Initial(s) | *Last Name | *Suffix (eg, Jr, III) | Academic Degrees | Institution                                          | Location (city, state/province, country) | Role or Contribution, eg, chair, principal investigator | Group (if more than 1 Group listed in the byline) and/or Subgroup (eg, Steering Committee) |  |
|-----------------------------------|------------|-----------------------|------------------|------------------------------------------------------|------------------------------------------|---------------------------------------------------------|--------------------------------------------------------------------------------------------|--|
| Zeeshan                           | Memon      |                       |                  | University of Miami Hospital                         | Miami, FL, United States                 | Sub-Investigator                                        |                                                                                            |  |
| Ivan                              | Mendoza    |                       |                  | University of Miami Hospital                         | Miami, FL, United States                 | Sub-Investigator                                        |                                                                                            |  |
| Raul                              | Mitrani    |                       |                  | University of Miami Hospital                         | Miami, FL, United States                 | Sub-Investigator                                        |                                                                                            |  |
| Gustavo                           | Ortiz      |                       |                  | University of Miami Hospital                         | Miami, FL, United States                 | Sub-Investigator                                        |                                                                                            |  |
| Jose                              | Ramano     |                       |                  | University of Miami Hospital                         | Miami, FL, United States                 | Sub-Investigator                                        |                                                                                            |  |
| Nicole                            | Sur        |                       |                  | University of Miami Hospital                         | Miami, FL, United States                 | Sub-Investigator                                        |                                                                                            |  |
| Luis                              | Torres     |                       |                  | University of Miami Hospital                         | Miami, FL, United States                 | Sub-Investigator                                        |                                                                                            |  |
| James                             | Daniels    |                       |                  | University of Texas (UT) Southwestern Medical Center | Dallas, TX, United States                | Sub-Investigator                                        |                                                                                            |  |

## Supplemental Online Content: Nonauthor Collaborators

\*Indicates required information. Only first name, last name, and suffix will appear in PubMed.

| *First Name and Middle Initial(s) | *Last Name | *Suffix (eg, Jr, III) | Academic Degrees | Institution                                          | Location (city, state/province, country) | Role or Contribution, eg, chair, principal investigator | Group (if more than 1 Group listed in the byline) and/or Subgroup (eg, Steering Committee) |  |
|-----------------------------------|------------|-----------------------|------------------|------------------------------------------------------|------------------------------------------|---------------------------------------------------------|--------------------------------------------------------------------------------------------|--|
| Mark                              | Johnson    |                       |                  | University of Texas (UT) Southwestern Medical Center | Dallas, TX, United States                | Principal Investigator                                  |                                                                                            |  |
| Alejandro                         | Magadan    |                       |                  | University of Texas (UT) Southwestern Medical Center | Dallas, TX, United States                | Sub-Investigator                                        |                                                                                            |  |
| Ty                                | Shang      |                       |                  | University of Texas (UT) Southwestern Medical Center | Dallas, TX, United States                | Sub-Investigator                                        |                                                                                            |  |
| Nancy                             | McClelland |                       |                  | Medtronic                                            | Mounds View, MN, United States           | Clinical trial leader                                   |                                                                                            |  |
| Theodore                          | Merriam    |                       |                  | Medtronic                                            | Mounds View, MN, United States           | Statistician                                            |                                                                                            |  |
| Karah                             | Neisen     |                       |                  | Medtronic                                            | Mounds View, MN, United States           | Program manager                                         |                                                                                            |  |
