# Supplementary material
Source: PubMed Central journal article supplement (PMC8170544)
Supplement: jama-e216470-s005.pdf [file jama-e216470-s005.pdf]

## **Data Sharing Statement**

### **Data**

**Data available:** No

### **Additional Information**

**Explanation for why data not available:** Subsequent secondary manuscripts are planned.
